# Supplementary material for: Study Designs for Evaluation of Combination Treatment: Focus On Individual Patient Benefit
Source: Preprints.org preprint supplement (doi:10.20944/preprints202201.0064.v1), 2022-01-06
Supplement: Supplementary file 1 [file supplementary]

## Sheet: Tabelle1
Assumptions			Calculated
Resp A	Resp B	Resp C	Resp T	P Harm
50	50	0	100	100
50	50	50	50	50
70	70	50	90	50
70	40	40	70	60
70	40	30	80	70
70	40	20	90	80
70	40	10	100	90
50	50	30	70	70
50	50	10	90	90
Measured			Calculated
Resp A	Resp B	Resp T	Resp C	P Harm
43	33	42	34	66
52	61	67	46	54
Definitions
Resp A	% Responders to monotherapy treatment A
Resp B	% Responders to monotherapy treatment B
Resp C	% of patients being a responder to treatments A and B
Resp T	Responders to combination treatment at the group level, defined as Resp A + Resp B - Resp I
P Harm	Patients exposed to combination treatment but not being responders to both monotherapies, i.e., 100 - Resp C
